# Supplementary material for: Mitochondrion-Mediated Cell Death through Erk1-Alox5 Independent of Caspase-9 Signaling
Source: MDPI journal article supplement (doi:10.3390/cells11193053), 2022-09-29
Supplement: s1 [file s1]

## Supplementary Figures and Tables

### Mitochondrion-mediated Cell Death through Erk1-Alox5 Independent of Caspase-9 Signaling

Min Chen<sup>1,\*</sup>, Lei Wang<sup>1</sup>, Huanhuan Sun<sup>1</sup>, Min Li<sup>2</sup>, Marietta M. Budai<sup>2</sup> and Jin Wang<sup>2,3\*</sup>

<sup>1</sup>Department of Pathology and Immunology, Baylor College of Medicine, Houston, TX 77030,  
USA

<sup>2</sup>Immunobiology and Transplant Science Center, Houston Methodist Research Institute, Houston,  
TX 77030, USA

<sup>3</sup>Department of Surgery, Weill Cornell Medical College, Cornell University, New York, NY  
10065, USA

\*Correspondence: [minc@bcm.edu](mailto:minc@bcm.edu) (M.C.); [jinwang@houstonmethodist.org](mailto:jinwang@houstonmethodist.org) (J.W.)

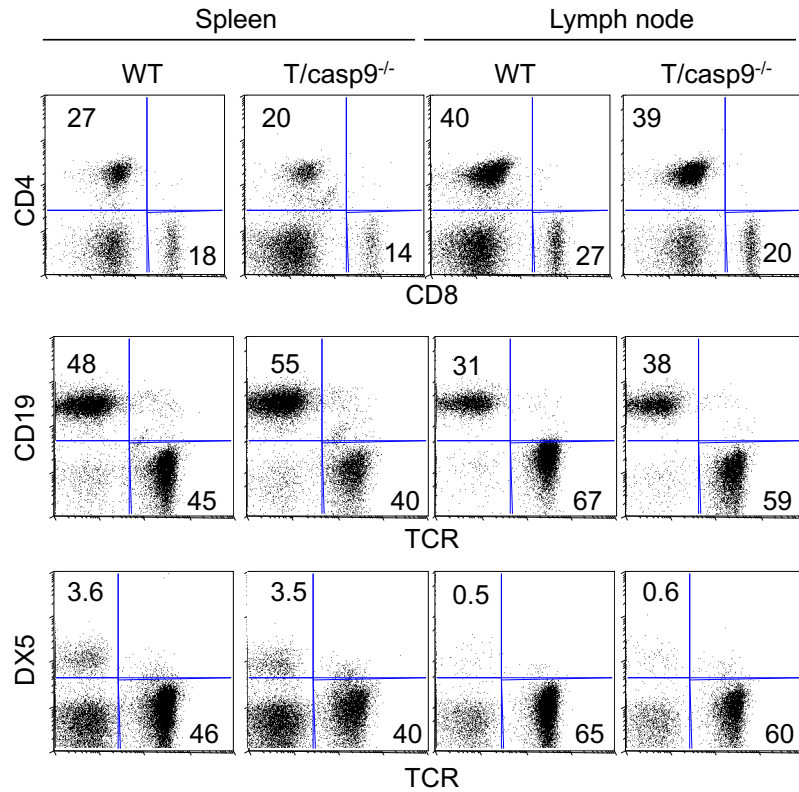

**Figure S1.** Lack of T cell accumulation in T/casp9<sup>-/-</sup> mice. Caspase-9<sup>flox</sup> mice were crossed with lck-cre mice to generate T/caspase-9<sup>-/-</sup> (T/casp9<sup>-/-</sup>) mice. Flow cytometry of the cells from the spleen and lymph nodes of 3-month-old T/casp9<sup>-/-</sup> mice and wild type (WT) controls was performed to analyze the following cell types: TCR<sup>+</sup> T cells, CD19<sup>+</sup> B cells, CD4<sup>+</sup> or CD8<sup>+</sup> T cells and DX5<sup>+</sup> NK cells.

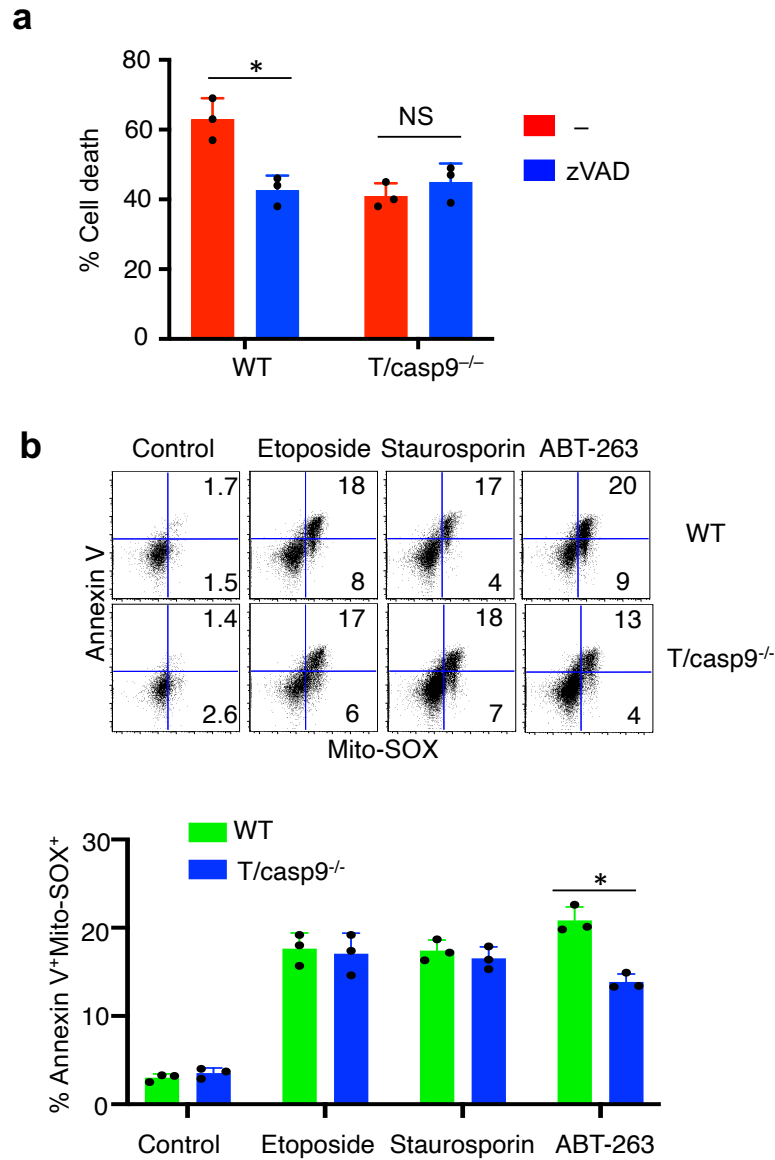

**Figure S2.** Induction of cell death in T cells from T/casp9<sup>-/-</sup> mice. (a) T cells from wild type and T/casp9<sup>-/-</sup> mice were cultured with 1  $\mu$ M ABT-263 with or without zVAD for 24 h. \*P<0.05; NS, statistically not significant. (b) Staining with Annexin V and Mito-SOX in wild type (WT) and casp9<sup>-/-</sup> T cells. Wild type and casp9<sup>-/-</sup> T cells were treated with etoposide (1  $\mu$ M), staurosporin (10 nM) or ABT-263 (1  $\mu$ M) for 6 h. The cells were stained with mito-SOX and APC Annexin V, and analyzed by flow cytometry. \*P<0.05.

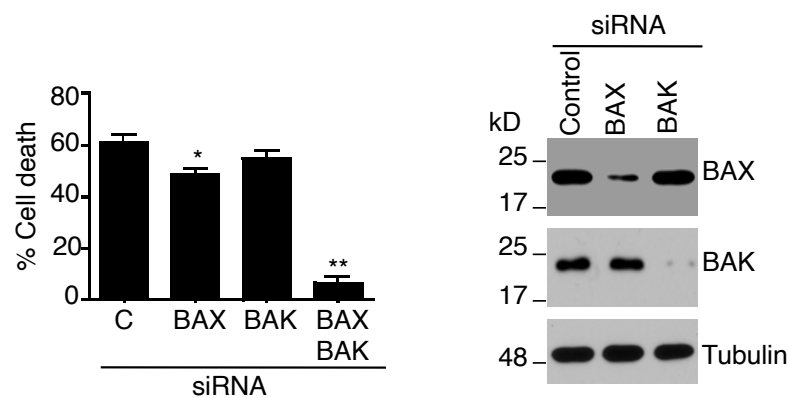

**Figure S3.** Transfection of JMR cells with siRNA. JMR cells were transfected with Alexa Fluro 488-conjugated siRNA (Qiagen) using RNAiMax (Life Technologies) and analyzed by flow cytometry. Dashed line: untransfected control. JMR cells were also transfected with siRNA targeting BAX and BAK. The cells were used to determine ABT-263-induced cell death or Western blot analysis. Data are presented as mean  $\pm$  SD. Comparison to control: \* $P$ <0.05, \*\* $P$ <0.01.

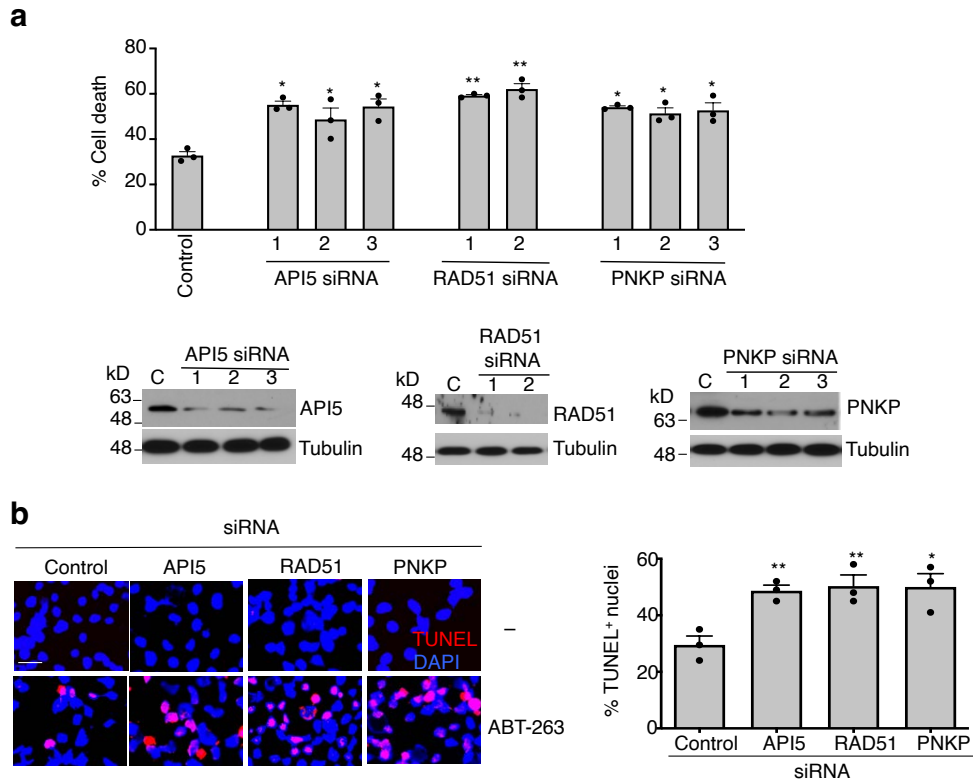

**Figure S4.** DNA damage repair genes in the inhibition of cell death in JMR cells. (a) JMR cells transfected with individual siRNA targeting different genes or non-targeting control (c) were treated with ABT-263, followed by quantitation of cell death (upper panels). Data are presented as mean  $\pm$  SD. \* $P < 0.05$ , \*\* $P < 0.01$ . Western blot was also performed for the transfected cells (lower panels). (b) Cells treated as in (a) were also used for TUNEL staining.

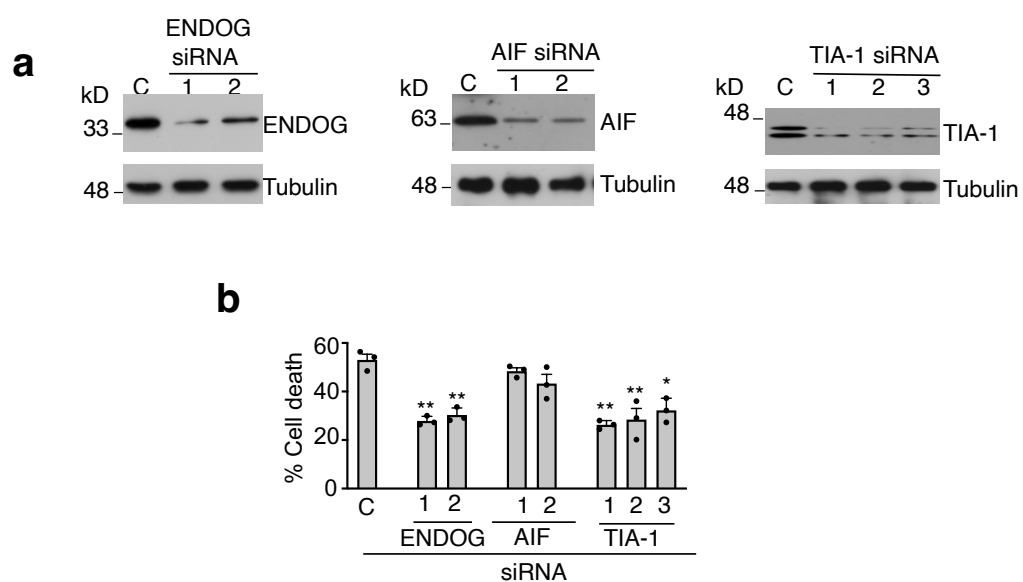

**Figure S5.** Targeting cell death molecules in JMR cells. (a) JMR cells transfected with individual siRNA targeting TIA-1, EndoG or AIF and analyses by Western blot. (b) The cells were used to determine ABT-263-induced cell death. Data are presented as mean  $\pm$  SD. Comparison to control: \* $P < 0.05$ , \*\* $P < 0.01$ .

**Table S1.** Candidate cell death genes identified in siRNA library screening.

| Gene symbol  | Classification                     |
|--------------|------------------------------------|
| KIAA0261     | Cell Cycle regulation              |
| SMC1L2       | Cell Cycle regulation              |
| PRM3         | Cell Cycle regulation              |
| ERAF         | Chaperone                          |
| HSPA8        | Chaperone                          |
| ERBP         | Chromatin remodeling               |
| TIA1         | Cytolytic/nuclease                 |
| WBSCR22      | DNA Methyltransferase              |
| ENDOG        | Endonuclease                       |
| MLL2         | Histone methyltransferase          |
| MAPK3        | Kinase                             |
| MAP3K3       | Kinase                             |
| MAPK6        | Kinase                             |
| MAP4K3       | Kinase                             |
| PAK1         | Kinase                             |
| TEK          | Kinase                             |
| ROS1         | Kinase                             |
| CAMKIINALPHA | Kinase regulator                   |
| RRAD         | Kinase regulator                   |
| HUNK         | Kinase regulator                   |
| GRHPR        | Metabolism                         |
| UGCG         | Metabolism                         |
| PDE5A        | Metabolism                         |
| MGC20781     | Metabolism                         |
| MGC23940     | Metabolism                         |
| DHODH        | Mitochondrial                      |
| HADHA        | Mitochondrial                      |
| PDP1         | Mitochondrial                      |
| LDHA         | Mitochondrial                      |
| BAX          | Mitochondrial/Pro-apoptotic        |
| ULBP3        | Other/Calcium mobilization         |
| HSGT1        | Other/p53 regulator                |
| ANGPT1       | Other/TEK/TIE2 receptor activation |
| FLJ38822     | Oxidative killing                  |
| ALOX5        | Oxidative stress                   |
| ALOX5AP      | Oxidative stress                   |
| NP           | Peptidase                          |
| THY28        | Pro-apoptotic                      |
| DDX47        | Pro-apoptotic                      |
| IGFBP3       | Pro-apoptotic                      |
| DKFZP547E052 | Protease                           |
| GULP1        | Protein trafficking                |
| LMAN2L       | Protein trafficking                |
| AP1S3        | Protein trafficking                |
| FLJ30990     | Protein trafficking                |
| COPB2        | Protein trafficking                |
| RABGGTA      | Protein trafficking                |
| RNASE8       | Ribonuclease                       |
| DDX27        | RNA helicase                       |
| SCA1         | RNA metabolism                     |
| EXOSC1       | RNA processing                     |
| DHX8         | RNA splicing                       |
| PRPF8        | RNA splicing                       |
| SFPQ         | RNA splicing                       |
| PLRG1        | RNA splicing                       |
| RGS20        | Signaling/G protein                |
| RASAL1       | Small G protein regulator          |
| RASGRF2      | Small G protein regulator          |
| RASGRP1      | Small G protein regulator          |
| CBFA2T1      | Transcription factor               |
| KLF3         | Transcription factor               |
| TEX10        | Transcription factor               |
| ZNF42        | Transcription factor               |
| SERTAD2      | Transcription factor               |
| MGC27466     | Transcription factor               |
| TSC2         | Tumor suppressor                   |
| WDR11        | Tumor suppressor                   |
| KIAA0953     | Unknown                            |
| THAP6        | Unknown                            |
| DCBLD1       | Unknown                            |

**Table S2.** Candidate anti-cell death genes identified in siRNA library screening.

| Gene symbols | Classification                               |
|--------------|----------------------------------------------|
| API5         | Anti-apoptotic                               |
| BCL2         | Anti-apoptotic                               |
| BCL2L1       | Anti-apoptotic                               |
| FMNL1        | Anti-apoptotic/proliferative                 |
| TIC          | Anti-apoptotic                               |
| ETUDE        | Anti-oxidative                               |
| MGST1        | Anti-oxidative                               |
| OXR1         | anti-oxidative                               |
| SESN2        | anti-oxidative                               |
| C10ORF9      | cell cycle                                   |
| PRCC         | cell cycle                                   |
| KIAA0542     | Cell cycle/dynamic structure of centrosome   |
| KIAA0056     | Cell cycle/mitotic chromosome assembly       |
| 384D8-2      | Cell cycle/mitotic chromosome assembly       |
| NELL2        | Cell growth and differentiation/neuron       |
| DRD3         | Cell proliferation                           |
| FGF10        | Cell proliferation and celldifferentiation   |
| RAD51        | DNA damage repair                            |
| PNKP         | DNA damage repair                            |
| MORF4L2      | Histone acetyltransferase                    |
| UTX          | Histone demethylase                          |
| FBXL11       | Histone demethylase                          |
| USP21        | Histone H2A/Deubiquitinates                  |
| MGC10731     | Membrane trafficking                         |
| ADHFE1       | Metabolism                                   |
| PRPSAP1      | Metabolism                                   |
| PYGL         | Metabolism                                   |
| GBA2         | Metabolism                                   |
| B4GALT2      | Metabolism/glycosylation                     |
| CPT1B        | Mitochondrial                                |
| NDUFB5       | Mitochondrial                                |
| NELL2        | Other/Neural cell growth and differentiation |
| NCDN         | Other/negative regulator of CaAMKII          |
| PPIF         | Protein folding                              |
| SIRT2        | Protein modification/Deacetylase             |
| CGI-100      | Protein trafficking                          |
| CGI-100      | Protein trafficking                          |
| SLC9A3R2     | Scaffold protein                             |
| ZFP161       | Transcription factor                         |
| MTF1         | Transcription factor                         |
| PLAGL2       | Transcription factor                         |
| NFIC         | Transcription factor                         |
| PITX3        | Transcription factor                         |
| ID1          | Transcription factor                         |
| LOC390284    | Unknown                                      |
| LOC400050    | Unknown                                      |
| LOC402475    | Unknown                                      |
| THSD6        | Unknown                                      |
| FLJ22160     | Unknown                                      |
| VPS24        | Unknown                                      |
| DNM1         | Vesicular trafficking                        |
| STX16        | Vesicular transpor                           |
| STX10        | Vesicular transport                          |



**Table S3.** Sequences of siRNAs used in this study.

| Gene symbol | siRNA# | siRNA Sequence             |
|-------------|--------|----------------------------|
| DHODH       | 1      | GGUAUGGAUUUAAACAGUCATT     |
| DHODH       | 2      | AGGAAACCCUAGACCCAGATT      |
| DHODH       | 3      | CGGGAUUUAUCAACUCAAATT      |
| HADHA       | 1      | CCGUCCUUUAUCUCAUCAAATT     |
| HADHA       | 2      | GGACAAUAGAAUACCUAGATT      |
| PDP1        | 1      | CAACGAGUUUGGGACUGUUTT      |
| PDP1        | 2      | CAGUCACGCUGUCUAAUGATT      |
| PDP1        | 3      | CGCAAGUUGGUGAUCCUAATT      |
| MGST1       | 1      | CAUUUCUUGGAAUUGGCCUCCUGUA  |
| MGST1       | 2      | CCAAGAAGUAUCUUCGAACAGAUGA  |
| MGST1       | 3      | GAUGCUUAUGAGUACUGCAACUGCA  |
| SESN2       | 1      | GCUACUCGCUGAUCCAGCGGCUUUA  |
| SESN2       | 2      | UCCGCAGGGCCAUCUGGAACUAUUAU |
| SESN2       | 3      | CCCAGACAUGCUGUGCUUUGUGGAA  |
| OXR1        | 1      | CCAUGGAAGAAGCCAUUCUUGUAAA  |
| OXR1        | 2      | UGGCUAUCCAUGGACUCUUGUUUAU  |
| OXR1        | 3      | GGAAGAUCAGAUUGCAGAUAAUUU   |
| SOD1        | 1      | GGAAGUCGUUUUGGCUUGUGGUGUAA |
| SOD1        | 2      | CCAUGUUCAGAGUUUGGAGAUAAU   |
| SOD1        | 3      | GACUGACUGAAGGCCUGCAUGGAUU  |
| Alox5       | 1      | GCACAUGUCCAGUCUUCUUGGAAU   |
| Alox5       | 2      | CCGCUCCCAUCUGCUUGCUGUAUAA  |
| Alox5       | 3      | GAGUACCUGACCGUGGUGAUCUUCA  |
| Alox5AP     | 1      | CCUGCUGCGUUUGCUGGACUGAUGU  |
| Alox5AP     | 2      | UCCGUUGCUGGCAUAUUAACUAUU   |
| Alox5AP     | 3      | ACACUUGCCUUUGAGCGGGUCUACA  |
| Erk1        | 1      | GGAUCAGCUCAACCACAUUTT      |
| Erk1        | 2      | GGACCGGAUGUUAAACCUUUTT     |
| API5        | 1      | GCAGCUCAAUUUAUCCGATT       |
| API5        | 2      | CCACAAGGUUUGUGACAUATT      |
| API5        | 3      | CGAGCAAUUAAAUCCUUUTT       |
| NEIL1       | 1      | GGCUCGCCCCUAGUUUCGUGGACAU  |
| NEIL1       | 2      | GGCUGCGUGGAGAAGUCCUCUGUCA  |
| NEIL1       | 3      | GCCAGCCAGUUUGUGAAUGAGGCCU  |
| RAD51       | 1      | CCACCAGACCCAGCUCCUUUAUCAA  |
| RAD51       | 2      | GCGACUCGCUGAUGAGUUUGGUGUA  |
| PNKP        | 1      | GCCACAACAACCGUUUCGAGAGAU   |
| PNKP        | 2      | UGAGACAGCCUGAAGCAAGGGAAA   |
| PNKP        | 3      | GGAAGUCCACCUUUCUCAAGAAGCA  |
| TIA-1       | 1      | GCGUCAGACUUUUUACCCATT      |
| TIA-1       | 2      | GAUAUUAUUUGUUCGGUUTT       |
| TIA-1       | 3      | CGCUCCAAAGAGUACAUAUTT      |
| ENDOG       | 1      | GGAACAACCUUGGAGAAAUATT     |
| ENDOG       | 2      | GCAGCUACCAAAACGUCUATT      |
| AIFM1       | 1      | GGAACAUCUUUAACCGAAUTT      |
| AIFM1       | 2      | GCAUGCUUCUACGAUUAUATT      |
